# Supplementary material for: Photolysis of HCOOH monomer and dimer in solid argon: Raman characterization of in situ formed molecular complexes
Source: Royal Society of Chemistry journal article supplement (doi:10.1039/b926658e), 2010-01-01
Supplement: b926658e.pdf [file b926658e.pdf]

**Table 1S.** Experimental and calculated Raman data of H<sub>2</sub>O...CO complex and H<sub>2</sub>O, CO monomers.

| <b>Theoretical</b>         |                   |            |                     | <b>Experimental</b>   |            |                                        |                |                    |
|----------------------------|-------------------|------------|---------------------|-----------------------|------------|----------------------------------------|----------------|--------------------|
| Frequency                  | Raman intensities | Freq shift | Ar matrix (IR data) | Ar matrix (this work) | Assignment |                                        |                |                    |
| <b>MP2/6-311++G(2d,2p)</b> |                   |            |                     |                       |            |                                        |                |                    |
| <b>H<sub>2</sub>O</b>      |                   |            |                     |                       |            |                                        |                |                    |
| 3982 (26)*                 | 313               | -          | 3948 (23)           | 280                   | -          | 3734.3 <sup>a</sup>                    | n.o.           | v <sub>as</sub> OH |
| 3862 (81)                  | 1049              | -          | 3822 (106)          | 1399                  | -          | 3638.0 <sup>a</sup>                    | 3641.2         | v <sub>s</sub> OH  |
| 1661 (5)                   | 247               | -          | 1628 (1)            | 58                    | -          | 1589.1 <sup>a</sup>                    |                | δH <sub>2</sub> O  |
| <b>CO</b>                  |                   |            |                     |                       |            |                                        |                |                    |
| 2114                       | 811               | -          | 2110 (25)           | 941                   | -          | 2138.5 <sup>b</sup>                    | 2141.0         | vCO                |
| <b>H<sub>2</sub>O...CO</b> |                   |            |                     |                       |            |                                        |                |                    |
| 3967 (35)                  | 432               | -15        | 3931 (33)           | 410                   | -17        | 3723.5 (-8.1) <sup>c</sup>             | 3726.8         | v <sub>as</sub> OH |
| 3843 (132)                 | 1713              | -19        | 3801 (155)          | 2067                  | -21        | 3627.8 (-8.8) <sup>c</sup>             | 3631.0 (-10.2) | v <sub>s</sub> OH  |
| 2125 (29)                  | 1047              | +11        | 2124 (32)           | 1155                  | +14        | 2149.2 (+10.2) <sup>c</sup>            | 2151.0 (+9.8)  | vCO                |
| 1671 (4)                   | 193               | +10        | 1637 (0.5)          | 29                    | +9         | 1595.4 (+5.4) <sup>c</sup>             | -              | δH <sub>2</sub> O  |
| 375 (0.03)                 | 11                | -          | 357 (0.01)          | 4                     | -          | -                                      | -              |                    |
| 233 (0.1)                  | 71                | -          | 234 (0.04)          | 22                    | -          | -                                      | -              |                    |
| 101 (0.1)                  | 187               | -          | 102 (0.13)          | 156                   | -          | -                                      | -              |                    |
| 74 (0.5)                   | 820               | -          | 70 (0.27)           | 470                   | -          | -                                      | -              |                    |
| 69 (0.6)                   | 1110              | -          | 65 (0.4)            | 822                   | -          | -                                      | -              |                    |
| <b>H<sub>2</sub>O...OC</b> |                   |            |                     |                       |            |                                        |                |                    |
| 3982 (34)                  | 409               | 0          | 3945 (29)           | 353                   | -3         | -                                      | -              | v <sub>as</sub> OH |
| 3865 (103)                 | 1327              | +3         | 3823 (131)          | 1723                  | +1         | -                                      | -              | v <sub>s</sub> OH  |
| 2110 (29)                  | 1051              | -4         | 2109 (32)           | 1191                  | -1         | 2130.3 (-5.7) (Kr matrix) <sup>c</sup> | -              | vCO                |
| 1666 (4.5)                 | 231               | +5         | 1631 (1)            | 54                    | +3         | 1593.5 (+6.5) (Kr matrix) <sup>c</sup> | -              | δH <sub>2</sub> O  |
| 221 (0.1)                  | 61                | -          | 212 (0.2)           | 108                   | -          | -                                      | -              |                    |
| 139 (0.3)                  | 264               | -          | 145 (0.08)          | 68                    | -          | -                                      | -              |                    |
| 71 (0.1)                   | 166               | -          | 78 (0.13)           | 204                   | -          | -                                      | -              |                    |
| 49 (1)                     | 2832              | -          | 46 (0.2)            | 594                   | -          | -                                      | -              |                    |
| 49 (1)                     | 2668              | -          | 27 (0.6)            | 2871                  | -          | -                                      | -              |                    |

<sup>a</sup> From ref [1] <sup>b</sup> From ref. [2] <sup>c</sup> From ref. [3] \* the calculated Raman scattering activities [ $\text{\AA}/\text{a.m.u.}$ ] are presented in the parentheses

**Table 2S.** Experimental and calculated Raman data of the ternary complexes .

| Calculated |                  |                   |            | Experimental                  |                            |
|------------|------------------|-------------------|------------|-------------------------------|----------------------------|
| Harmonic   | Raman activities | Raman intensities | Freq shift | Ar matrix (this work)         |                            |
| 3961       | 34               | 422               | -21        | -                             | $\nu_{as}OH$               |
| 3828       | 119              | 1563              | -34        | 3615.5 (-27.0)                | $\nu_sOH$                  |
| 2400       | 0.1              | 4                 | +3         | -                             | $\nu_{as}CO_2$             |
| 2129       | 29               | 1064              | +15        | 2158.1 (+17.8)                | $\nu CO$                   |
| 1662       | 3                | 157               | +1         | -                             | $\delta H_2O$              |
| 1320       | 33               | 2313              | +3         | - $\nu_+$<br>1287.2 $\nu_+$ ? | $\nu_sCO_2$                |
| 666        | 0.01             | 1                 | +3         | -                             | $\delta CO_2$              |
| 650        | 0.1              | 24                | -13        | -                             | $\delta CO_2$              |
| 409        | 0.1              | 26                | -          | -                             | inter-molecular vibrations |
| 266        | 0.2              | 101               | -          | -                             |                            |
| 145        | 0.7              | 606               | -          | -                             |                            |
| 121        | 0.7              | 742               | -          | -                             |                            |
| 111        | 0.3              | 331               | -          | -                             |                            |
| 104        | 0.2              | 277               | -          | -                             |                            |
| 73         | 1.7              | 2907              | -          | -                             |                            |
| 66         | 1.2              | 2295              | -          | -                             |                            |
| 28         | 0.2              | 826               | -          | -                             |                            |
| 24         | 1.6              | 8422              | -          | -                             |                            |

**Figure 1S.** BSSE-optimized structures of the most stable  $CO_2 \dots H_2O \dots CO$  complex. All presented geometrical parameters were calculated at MP2 level using 6-311++G(2d,2p) basis set.

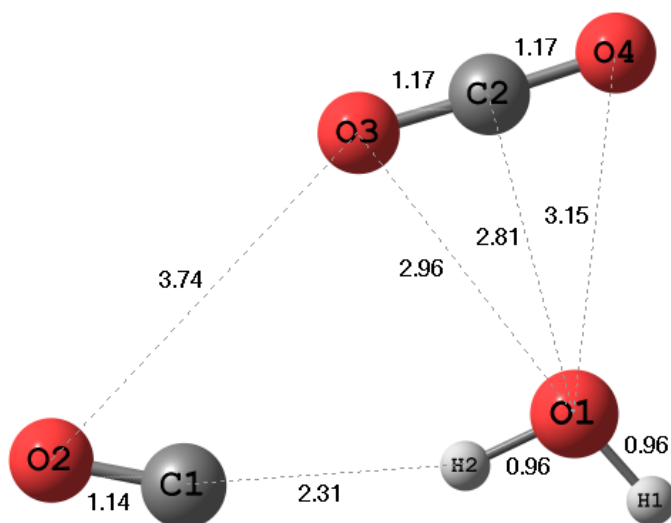

---

<sup>1</sup> A. Engdahl, B. Nelander, *J. Mol. Struct.*, 193 (1989) 101

<sup>2</sup> A.Schrifer, L. Schriver-Mazzuoli, A.A. Vigasin, *Vib. Spectr.* 23 (2000) 83

<sup>3</sup> J. Lundell, M. Räsänen, *J. Mol. Struct.* 436 (1997) 349
